# Supplementary material for: A small-molecule SARS-CoV-2 inhibitor targeting the membrane protein
Source: Research Square preprint supplement (doi:10.21203/rs.3.rs-3975125/v1), 2024-03-07
Supplement: Supplementary file 1 [file 9fb3a010e2da75219c66c774.docx]

**Supplementary Information**

**A small-molecule SARS-CoV-2 inhibitor targeting the membrane protein**

Ellen Van Damme,1 Pravien Abeywickrema,2$ Yanting Yin,2$ Jiexiong Xie,1$ Sofie Jacobs,1$ Mandeep Kaur Mann,3 Robyn Miller,2 Madison Piassek,2 Jordi Doijen,1 Simone Marsili,4 Murali Subramanian,5,14 Leah Gottlieb,2,13 Rana Abdelnabi,6,7 Michiel Van Gool,4 Nick Van den Broeck,8 Ines De Pauw,8 Annick Diels9, Peter Vermeulen9, Koen Temmerman9, Trevor Scobey,10 Melissa Mattocks,11Alexandra Schäfer,10 Dirk Jochmans,6 Steven De Jonghe,6 Pieter Leyssen6, Winston Chiu6, Mayra Diosa Toro,12,18 Marleen Zwaagstra,12 Anouk A. Leijs,13 Heidi L.M. de Gruyter,13 Christophe Buyck1, Klaas van den Heede,1,17 Frank Jacobs,5 Christel Van den Eynde,1 Laura Thijs,8 Valerie Raeymaekers,8 Seth Miller,2,14 Amanda Del Rosario,2 Johan Neyts,6 Danielle Peeters9, Ralph S Baric,10,11 Frank JM van Kuppeveld,12 Eric J. Snijder,13 Martijn J. van Hemert,13 Mario Monshouwer,5 Sujata Sharma,2 Ruxandra Draghia-Akli,3 Anil Koul,1* Marnix Van Loock1*

$contributed equally

*these authors jointly supervised the work

1. Global Public Health R&D, Janssen Pharmaceutica NV, Beerse, Belgium

2. Discovery Technologies & Molecular Pharmacology, Janssen Research & Development, LLC, Spring House, PA, USA

3. Global Public Health R&D, Janssen Research & Development, LLC, Spring House, PA, USA

4. Therapeutics Discovery, Janssen-Cilag, S.A, Toledo, Spain

5. Translational PK/PD & Investigative Toxicology (TPPIT), Janssen Research & Development, LLC, Beerse, Belgium

6. Laboratory of Virology and Chemotherapy, Department of Microbiology, Immunology and Transplantation, Rega Institute for Medical Research, University of Leuven (KU Leuven), Leuven, Belgium

7. Department of Microbiology, Immunology and Transplantation, VirusBank Platform, KU Leuven, Leuven, Belgium

8. Charles River Laboratories, Beerse, Belgium

9. Discovery Technologies & Molecular Pharmacology, Janssen Research & Development, LLC, Beerse, Belgium

10. Department of Epidemiology, University of North Carolina at Chapel Hill Gillings School of Global Public Health, Chapel Hill, NC, USA

11. Department of Microbiology and Immunology, University of North Carolina at Chapel Hill School of Medicine, Chapel Hill, NC, USA

12. Virology Section, Division of Infectious Diseases and Immunology, Department of Biomolecular Health Sciences, Faculty of Veterinary Medicine, Utrecht University, Utrecht, the Netherlands

13. Molecular Virology Laboratory, Leiden University Center of Infectious Diseases, Leiden University Medical Center, ZA Leiden, the Netherlands

14. Present address: Spark Therapeutics, Inc, Philadelphia, PA, USA

15. Present address: BioAnalysis, LLC, Philadelphia, PA, USA

16. Present address: Gilead Sciences, Foster City, CA, USA

17. Present address: Independent researcher, Mechelen, Belgium

18. Present address: Eurofins BioPharma Product Testing, CM Leiden, the Netherlands

**Corresponding author:** Anil Koul, AKOUL@its.jnj.com; Draghia Akli, Ruxandra, rdraghia@gmail.com; Marnix Van Loock, mvloock@its.jnj.com

**Content**

1. **Supplementary Methods (pages 1–16)**

General information about the synthesis of JNJ-9676, the culture conditions of cells used for antiviral assays and the generation of virus stocks can be found in the Supplementary Methods. Information about broad-spectrum coronavirus antiviral assays, time-of-addition assay, sequence alignment, *in vitro* resistance selection assay**,** generation of site-directed viral mutants***,*** determination of replication kinetic studies for site-directed mutant viruses and the post-exposure Syrian golden hamster model is provided in the Supplementary Methods.
